# Supplementary material for: Exogenous melatonin treatment on post-harvest jujube fruits maintains physicochemical qualities during extended cold storage
Source: PeerJ. 2022 Oct 14;10:e14155. doi: 10.7717/peerj.14155 (PMC9575678; doi:10.7717/peerj.14155)
Supplement: Supplemental Information 1 [file peerj-10-14155-s001.xlsx]

## Sheet: Storage effectiveness
Crisp fine fruits rate							Crisp rotten fruits rate							Soft fruits rate							Rotten fruits rate
Melatonin treatment	Storage time	Average	SD	Significance of difference			Melatonin treatment	Storage time	Average	SD	Significance of difference			Melatonin treatment	Storage time	Average	SD	Significance of difference			Melatonin treatment	Storage time	Average	SD	Significance of difference
0	3d	66.9333	7.97266	cd			0	3d	26.56	2.13712	b			0	3d	6.69	0.630238	a			0	3d	0	0	a
50	3d	86.7667	11.0753	a			50	3d	6.59	1.31183	d			50	3d	6.75	0.673573	a			50	3d	0	0	a
100	3d	83.3333	6.85006	ab			100	3d	10.1733	1.70661	cd			100	3d	6.86667	0.457857	a			100	3d	0	0	a
200	3d	82.8667	10.4806	ab			200	3d	13.64	1.4894	c			200	3d	3.36667	0.376342	b			200	3d	0	0	a
400	3d	59.9	7.37496	d			400	3d	33.2933	3.05517	a			400	3d	6.67333	0.555008	a			400	3d	0	0	a
0	6d	49.8667	4.2548	b			0	6d	36.73	2.91046	a			0	6d	10.33	1.3946	b			0	6d	3.35	0.430349	a
50	6d	66.9	7.53193	a			50	6d	26.6567	3.58002	b			50	6d	6.63333	0.755667	c			50	6d	0	0	b
100	6d	56.6333	7.21272	ab			100	6d	30.0667	3.77044	b			100	6d	13.33	0.78	a			100	6d	0	0	b
200	6d	61.9	3.83145	a			200	6d	27.6567	3.3505	b			200	6d	10.3767	0.825611	b			200	6d	0	0	b
400	6d	46.7	5.76628	b			400	6d	41.31	4.16544	a			400	6d	10.23	0.850353	b			400	6d	0	0	b
0	9d	46.7	4.94874	ab			0	9d	45.74	5.01016	b			0	9d	16.71	1.5004	b			0	9d	3.35333	0.265769	a
50	9d	53.3333	6.27721	a			50	9d	33.2233	2.94145	c			50	9d	13.1467	1.05699	c			50	9d	0	0	b
100	9d	40.2333	5.07674	b			100	9d	40.2933	4.6769	bc			100	9d	16.5867	0.917842	b			100	9d	3.39333	0.418609	a
200	9d	30.8	4.5	c			200	9d	48.3933	5.89082	b			200	9d	20.6067	1.80644	a			200	9d	0	0	b
400	9d	20.2333	3.61156	d			400	9d	65.5433	4.77504	a			400	9d	14.0233	1.29585	c			400	9d	0	0	b
0	12d	10.2667	2.13854	c			0	12d	55.2433	5.16039	a			0	12d	20.62	2.24582	b			0	12d	13.8	1.18503	a
50	12d	24.4333	3.5949	a			50	12d	48.39	4.77595	a			50	12d	17.3833	1.58985	b			50	12d	10.3533	1.34005	b
100	12d	19.9667	3.58097	ab			100	12d	49.9233	4.33551	a			100	12d	20.2533	2.75874	b			100	12d	10.14	1.09672	b
200	12d	16.7333	2.59294	b			200	12d	50.2167	6.00793	a			200	12d	16.7633	1.9217	b			200	12d	16.6733	1.025	b
400	12d	10.1	1.81934	c			400	12d	51.84	7.49501	a			400	12d	25.77	2.64363	a			400	12d	11.2367	1.40429	b
0	15d	0	0	d			0	15d	50.5733	6.76824	a			0	15d	27	2.08115	cd			0	15d	23.1733	1.38237	a
50	15d	11.5333	1.70392	a			50	15d	38.2633	4.72807	b			50	15d	30.7533	3.37503	bc			50	15d	19.2667	1.41536	ab
100	15d	6.73333	1.06927	b			100	15d	50.7633	5.19593	a			100	15d	22.2233	3.895	d			100	15d	18.5433	2.0951	b
200	15d	3.6	0.781025	c			200	15d	38.28	4.63822	b			200	15d	35.8167	3.46123	ab			200	15d	21.5167	2.31122	ab
400	15d	0	0	d			400	15d	39.9667	5.17008	b			400	15d	40.1333	6.13109	a			400	15d	20.1567	2.88819	ab

## Sheet: Weight loss
Weight loss
Melatonin treatment	Storage time	Average	SD	Significance of difference
0	3d	4.64423	0.881693	a
50	3d	2.13731	0.390787	c
100	3d	2.17293	0.658353	c
200	3d	2.66821	0.81534	bc
400	3d	3.36124	0.823574	b
0	6d	5.62705	0.669055	a
50	6d	2.23889	0.493864	d
100	6d	3.99382	0.81234	b
200	6d	3.05841	0.973014	c
400	6d	4.52115	0.711214	b
0	9d	6.32235	0.863017	a
50	9d	3.14373	0.863367	c
100	9d	4.9794	0.83258	b
200	9d	5.17422	0.759313	b
400	9d	6.07245	0.662222	ab
0	12d	8.78094	0.882352	a
50	12d	5.03553	0.909027	c
100	12d	5.74336	0.660108	bc
200	12d	6.48371	0.920595	b
400	12d	8.28653	0.640839	a
0	15d	10.0393	0.661683	a
50	15d	5.89461	0.676839	d
100	15d	7.63364	0.876386	c
200	15d	8.66646	0.934753	bc
400	15d	8.74985	0.798052	b

## Sheet: Firmness
Firmness
Melatonin treatment	Storage time	Average	SD	Significance of difference
0	0d	0.324265	0.0332741	a
50	0d	0.324265	0.0332741	a
100	0d	0.324265	0.0332741	a
200	0d	0.324265	0.0332741	a
400	0d	0.324265	0.0332741	a
0	3d	0.31214	0.0509388	a
50	3d	0.315396	0.0489006	a
100	3d	0.313423	0.0461396	a
200	3d	0.298751	0.027061	a
400	3d	0.300885	0.0246365	a
0	6d	0.262474	0.0348432	b
50	6d	0.286782	0.0274885	a
100	6d	0.277065	0.0278051	ab
200	6d	0.265237	0.016545	ab
400	6d	0.266311	0.0323631	ab
0	9d	0.253756	0.0309541	b
50	9d	0.27802	0.0418397	a
100	9d	0.272573	0.0355102	ab
200	9d	0.2589	0.0292823	ab
400	9d	0.260043	0.0310928	ab
0	12d	0.238244	0.037166	b
50	12d	0.266182	0.0504232	a
100	12d	0.251998	0.0359936	ab
200	12d	0.253103	0.0543909	ab
400	12d	0.247709	0.0421993	ab
0	15d	0.222813	0.0315977	b
50	15d	0.243877	0.0335578	a
100	15d	0.235277	0.0471951	ab
200	15d	0.236382	0.0319414	ab
400	15d	0.234597	0.0338001	ab

## Sheet: SOD
SOD
Melatonin treatment	Storage time	Average	SD	Significance of difference
0	0d	314.878	9.74953	a
50	0d	314.878	9.74953	a
100	0d	314.878	9.74953	a
200	0d	314.878	9.74953	a
400	0d	314.878	9.74953	a
0	3d	237.102	8.11062	cd
50	3d	249.138	11.7897	bc
100	3d	221.447	6.86199	d
200	3d	280.604	25.6975	a
400	3d	271.813	30.199	ab
0	6d	278.451	37.7667	a
50	6d	225.776	7.54366	b
100	6d	290.814	11.9452	a
200	6d	247.477	5.09859	b
400	6d	245.472	5.93149	b
0	9d	215.129	47.7573	b
50	9d	314.199	15.7365	a
100	9d	308.646	44.4888	a
200	9d	354.05	63.673	a
400	9d	352.763	26.8808	a
0	12d	256.236	32.1954	b
50	12d	268.404	12.0628	b
100	12d	281.743	36.0601	b
200	12d	342.74	6.31959	a
400	12d	273.435	25.7799	b
0	15d	145.666	14.9339	c
50	15d	194.849	18.361	b
100	15d	101.714	19.3749	d
200	15d	193.991	18.4132	b
400	15d	229.325	9.26683	a

## Sheet: TSS
TSS
Melatonin treatment	Storage time	Average	SD	Significance of difference
0	0d	16.375	0.629153	a
50	0d	16.375	0.629153	a
100	0d	16.375	0.629153	a
200	0d	16.375	0.629153	a
400	0d	16.375	0.629153	a
0	3d	16.5	0.408248	a
50	3d	17.125	0.478714	a
100	3d	17.125	0.478714	a
200	3d	17	0.866025	a
400	3d	17	0.5	a
0	6d	17	0	b
50	6d	17.5	0.408248	ab
100	6d	16.75	0.645497	b
200	6d	17.3333	0.57735	ab
400	6d	18.1667	0.763763	a
0	9d	16.95	0.5	b
50	9d	19.1	1.13431	a
100	9d	18.8333	0.251661	a
200	9d	17.65	0.264575	b
400	9d	17.0333	0.64291	b
0	12d	17.625	0.457347	b
50	12d	17.55	0.191485	b
100	12d	17.1333	0.251661	b
200	12d	16.375	0.298608	c
400	12d	18.2333	0.057735	a
0	15d	18	0.270801	a
50	15d	17.7333	0.305505	a
100	15d	17.6	0.173205	a
200	15d	15.5333	0.11547	b
400	15d	15.9	1.21244	b

## Sheet: TA
TA
Melatonin treatment	Storage time	Average	SD	Significance of difference
0	0d	0.368443	0.00229506	a
50	0d	0.368443	0.00229506	a
100	0d	0.368443	0.00229506	a
200	0d	0.368443	0.00229506	a
400	0d	0.368443	0.00229506	a
0	3d	0.559841	0.0159017	b
50	3d	0.457151	0.00515839	c
100	3d	0.66165	0.016354	a
200	3d	0.555233	0.0206441	b
400	3d	0.468578	0.0128615	c
0	6d	0.449656	0.0304766	c
50	6d	0.582425	0.029831	a
100	6d	0.416672	0.0202578	cd
200	6d	0.524322	0.021167	b
400	6d	0.37706	0.0098323	d
0	9d	0.485265	0.0421646	a
50	9d	0.523205	0.0096962	a
100	9d	0.498574	0.0313782	a
200	9d	0.50614	0.0109689	a
400	9d	0.402138	0.0353897	b
0	12d	0.537615	0.0748852	b
50	12d	0.511578	0.0170723	b
100	12d	0.539295	0.0291713	b
200	12d	0.592845	0.0261435	b
400	12d	0.779063	0.0706775	a
0	15d	0.469673	0.0105788	a
50	15d	0.417618	0.00355318	c
100	15d	0.424075	0.00975771	c
200	15d	0.46932	0.00336885	a
400	15d	0.446896	0.00883254	b

## Sheet: AsA
AsA
Melatonin treatment	Storage time	Average	SD	Significance of difference
0	0d	193.362	6.98992	a
50	0d	193.362	6.98992	a
100	0d	193.362	6.98992	a
200	0d	193.362	6.98992	a
400	0d	193.362	6.98992	a
0	3d	171.985	12.934	a
50	3d	137.187	9.89867	b
100	3d	127.288	3.41814	c
200	3d	166.641	6.3531	a
400	3d	137.005	5.3552	b
0	6d	103.968	3.64375	b
50	6d	107.673	10.6944	b
100	6d	105.912	2.915	b
200	6d	100.082	4.05751	b
400	6d	123.402	19.4045	a
0	9d	97.1667	6.47727	d
50	9d	129.718	14.1685	a
100	9d	104.94	7.57339	cd
200	9d	116.6	6.18365	b
400	9d	108.827	4.60902	bc
0	12d	124.373	9.55747	b
50	12d	112.713	12.1288	c
100	12d	110.284	13.4375	c
200	12d	146.722	5.83	a
400	12d	126.802	7.75161	b
0	15d	110.284	8.40435	c
50	15d	128.26	5.78427	b
100	15d	113.685	7.88264	c
200	15d	126.803	6.18365	b
400	15d	136.519	4.24931	a

## Sheet: MDA
MDA
Melatonin treatment	Storage time	Average	SD	Significance of difference
0	0d	0.00571333	0.000431949	a
50	0d	0.00571333	0.000431949	a			0	3	6	9	12	15
100	0d	0.00571333	0.000431949	a		Control													Control
200	0d	0.00571333	0.000431949	a		50μM													50μM
400	0d	0.00571333	0.000431949	a		100μM													100μM
						200μM													200μM
0	3d	0.00414175	0.000711351	b		400μM													400μM
50	3d	0.00448506	0.000895956	b
100	3d	0.00446739	0.00106413	b
200	3d	0.00439735	0.000348911	b
400	3d	0.00525343	0.000728973	a
0	6d	0.00596453	0.000789315	a
50	6d	0.00412302	0.000523604	b
100	6d	0.00308192	0.000570565	d
200	6d	0.00365186	0.000536173	c
400	6d	0.00369273	0.000710339	c
0	9d	0.0034347	0.000380367	c
50	9d	0.00398029	0.000348663	a
100	9d	0.00381585	0.000796497	ab
200	9d	0.00407567	0.000435923	a
400	9d	0.00360315	0.000230875	bc
0	12d	0.00356485	0.000933311	a
50	12d	0.00183471	0.000355192	d
100	12d	0.00222396	0.000269658	c
200	12d	0.00315266	0.000832686	b
400	12d	0.00224618	0.000271244	c
0	15d	0.00711642	0.000662069	a
50	15d	0.00682151	0.000433617	b
100	15d	0.00606987	0.00077701	c
200	15d	0.0053817	0.000651723	d
400	15d	0.00436392	0.000654781	e
